# Supplementary material
Source: Research Square preprint supplement (doi:10.21203/rs.3.rs-9421260/v1)
Supplement: Supplementary file 1 [file 33be3b3650f4d5c8cc7180a2.docx]

### Supplementary Figure legends

### Fig. S1 Physical association of Src and IRS4 mediated by SH3 and PH domain interaction.

(A) Schematic representation of the domain structures of human C-Src and IRS4, along with Src deletion mutants (ΔH1, ΔSH2, ΔSH3, or ΔSH4). Numbers indicate amino acid positions.

(B) GST pull-down assays were performed using GST-tagged Src or its deletion mutants incubated with lysates from 293T cells expressing Flag-IRS4.

(C) Schematic diagrams of IRS4 truncated fragments, including the PH-domain, PTB-domain, and C-domain, relative to full-length Src.

(D)Recombinant GST or GST-Src proteins were incubated with His-HA-tagged IRS4 fragments (PH, PTB, or C-domain).

### Fig. S2 Phosphosite analysis of IRS4

(A)Identification of Src-induced phosphorylation sites on IRS4 by mass spectrometry. (B) Evolutionary conservation analysis of the IRS4 YY111/112 site. Multiple sequence alignment was performed using protein sequences from various vertebrate species, including Homo sapiens, Mus musculus, and Xenopus tropicalis.

(C) Dot blot assay for the validation of phospho-specific antibody clones (#SAB176P-A and #SAB176P-B). Synthetic peptides containing the YY111/112 site were immobilized on membranes in the indicated amounts in their unmodified and doubly phosphorylated states.

### Fig. S3 Tyrosine phosphorylation of IRS4 at Y111/112 is essential for its oncogenic functions in LUAD cells.

(A)Western blot analysis of IRS4 expression in H226-Control, H226-shIRS4-1 (3’-UTR), and H226-shIRS4-2(3’-UTR) stable cell lines. H226-shIRS4-2 was used for subsequent experiments.

(B) Western blot analysis of IRS4 expression in A549, A549-IRS4-WT, or A549-IRS4-YY111/112FF stable cell lines.

(C) CCK-8 assays were used to detect the cell viability of A549, A549-IRS4-WT, or A549-IRS4-YY111/112FF stable cell lines for 5 d (n =4).

(D) Colony formation assays were used to evaluate the colony-forming ability of A549, A549-IRS4-WT, or A549-IRS4-YY111/112FF stable cell lines (n =3).

(E) Transwell migration assay was used to evaluate the migration ability of A549, A549-IRS4-WT, or A549-IRS4-YY111/112FF stable cell lines after 24 h post-seeding (n =3).

(F) Wound healing assay was conducted to assess the migration ability of A549, A549-IRS4-WT, or A549-IRS4-YY111/112FF stable cell lines after 18 h post-seeding (n =3).

(G). Soft-agar colony formation assay used to evaluate anchorage-independent growth of A549, A549-IRS4-WT, or A549-IRS4-YY111/112FF stable cell lines (n=3). Statistical analysis was performed using one-way ANOVA or two-way ANOVA with multiple comparisons. *P < 0.05; **P < 0.01; ***P < 0.001; ****P < 0.0001. ; ns, not significant.

### Fig. S4 Characterization of the IRS4-p85β interaction interface and clinical relevance in LUSC.

(A) Relative protein abundance of p85α (PIK3R1) and p85β (PIK3R2) in paired normal and tumor lung squamous cell carcinoma samples (n = 102). Data from CPTAC

(B) Mapping of the IRS4-binding domains on p85β. 293T Cells were transfected with Flag-IRS4, HA-Src, and various Myc-tagged p85β deletion mutants (ΔN-SH2, ΔC-SH2, or ΔDouble-SH2). Co-IP analyzed the interaction.

(C) Computational analysis of residue-level interaction differences between IRS4 and p85β upon Y111/112 phosphorylation. The table summarizes changes in minimum atom distances for residues within the p85β SH2 domain proximal to IRS4 Y779 site.

### Fig. S5 Phosphorylation at YY111/112 does not affect IRS4 protein stability or subcellular localization.

(A) H226shIRS4-IRS4-WT or H226shIRS4-IRS4-YY111/112FF cells were treated with cycloheximide (CHX,100 μg/mL) for the indicated time points. Cell lysates were subjected to immunoblotting with anti-Flag to detect IRS4 protein levels. Tubulin was used as a loading control.

(B) Quantification of IRS4 protein levels following CHX treatment shown in (A). Relative IRS4 levels were normalized to Tubulin and expressed as a percentage of the 0 h time point. Data represent mean ± SD from three independent experiments. Statistical analysis was performed using a two-tailed Student’s *t*-test; ns, not significant. (C) Subcellular fractionation analysis of H226shIRS4-IRS4-WT or H226shIRS4-IRS4-YY111/112F cells. Cytoplasmic and membrane fractions were analyzed by WB. N-cadherin and GAPDH were used as membrane and cytoplasmic markers, respectively.

(D) Nuclear and cytoplasmic fractions from H226shIRS4-IRS4-WT or H226shIRS4-IRS4-YY111/112FF cells analyzed by WB. Lamin B1 and GAPDH were used as nuclear and cytoplasmic markers, respectively.

### Fig. S6 Tat-conjugated phospho-peptide treatment does not affect body weight in xenograft-implanted mice.

(A) Body weight monitoring of nude mice with H226 xenograft tumors in the indicated groups. Peptide administration was initiated 14 d after tumor cell inoculation. Body weight was recorded every two days throughout the experimental period. Data are presented as mean ± SD (n = 5 per group). Statistical analysis was performed using two-way ANOVA with multiple comparisons. ns, not significant.
