# Supplementary material
Source: Research Square preprint supplement (doi:10.21203/rs.3.rs-9421260/v1)
Supplement: Supplementary file 2 [file 7ae9b05e208057268f35748f.docx]

**Table S1. Sequences of primers used for plasmid construction**

| Primer name | Sequence (5' to 3') |
| --- | --- |
| Flag-IRS4-F | AGCTTATGGCGAGTTGCTCCTTCACTCG |
| Flag-IRS4-R | CTTACCGACCTCTTTTGGGAGAGT |
| IRS4-YY111/112FF-F | TTCTTCGAAAATGCCAGGAAGTTCCGGCACAGTGTCC |
| IRS4-YY111/112FF-R | TTCCAGCCGAGCTGGGGCGTCAGCAGTCTCGAGTTTG |
| IRS4-Y700F-F | TTCGTGCCAATGAGGCCAGGGGTGGCCACCCCTCT |
| IRS4-Y700F-R | TGGGTCATCCTCATCTTCATCAAAAGCTCTGGCTC |
| IRS4-Y717F-F | TTTATGCCAATGGCTCCTCAAAATGTCTCTGCTTCAA |
| IRS4-Y717F-R | ATCACTGGAGCTTACAAGAGGGGTGGCCACCCCTGGC |
| IRS4-Y743F-F | TTCATGATGATGTTTCCCAGAGTGAGCCCA |
| IRS4-Y743F-R | CCCTCTTGAATCTTCAAAAGGGGATCGAGA |
| IRS4-Y808F-F | TTCTTCTCTCTACCAAACCCTTTTCGGAGCTCACCTTT |
| IRS4-Y808F-R | GGAGCTCCAACTTTTGGAGGAAGAGCCACCCTGAGGAT |
| MYC-P85B-F | ATAAGAATGCGGCCGCATGGCGGGCCCTGAGGGCTTCC |
| MYC-P85B-R | CCGGAATTCGCGGGCGGCAGGCGGCGGGC |
| P85B-KL376-377AA-F | GCGATCAAGGTCTTCCACCGAGATG |
| P85B-KL376-377AA-R | CGCATTGTTCCCGCCTTTCCTGAGG |
| Src-Y419F-F | TTCACGGCGCGGCAAGGTGCCAAAT |
| Src-Y419F-R | CTCATTGTCTTCAATGAGCCGAGCCAGC |
| Src-Y530F-F | TTCCAGCCCGGGGAGAACCTCTAG |
| Src-Y530F-R | CTGGGGCTCGGTGGACGTGAAGTA |
| GST-RPTPα-F | ACGCGTCGACCGATGGATTCCTGGTTCATTC |
| GST-RPTPα-R | ATAGTTTAGCGGCCGCTTACTTGAAGTTGGCATAA |
